# Supplementary material for: Hepatic expression of lipopolysaccharide-binding protein (Lbp) is induced by the gut microbiota through Myd88 and impairs glucose tolerance in mice independent of obesity
Source: PubMed Central journal article supplement (PMC7229497; doi:10.1016/j.molmet.2020.100997), 2020-04-16
Supplement: mmc1.pdf [file mmc1.pdf]

## SUPPLEMENTARY MATERIAL

1. Supplementary Figure 1
2. Supplementary Figure 2
3. Supplementary Figure 3
4. Supplementary Table 1
5. Supplementary Table 2

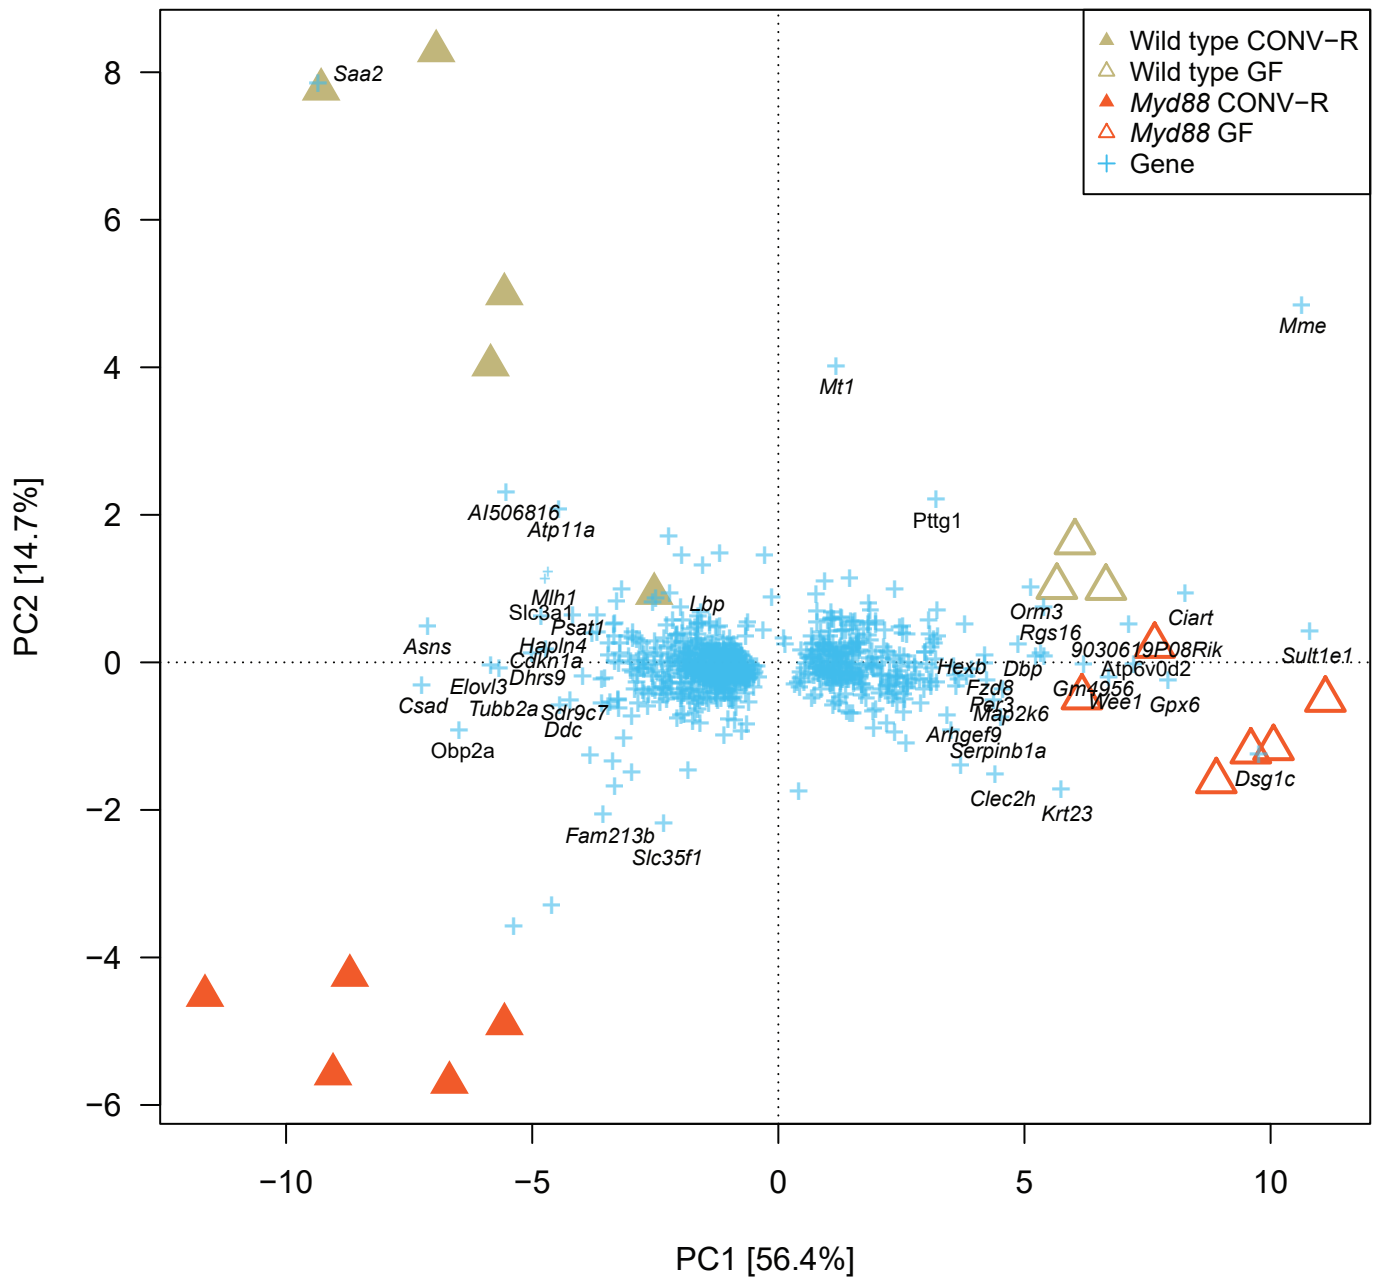

**Supplementary Figure 1. Biplot of gene expression displaying PCA of samples and individual genes.**

A

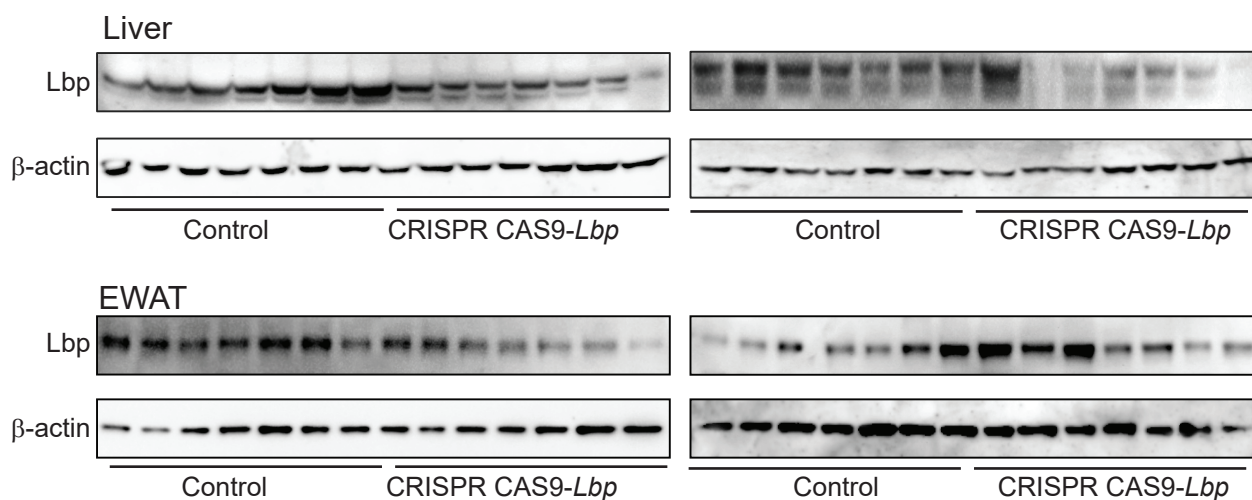

B

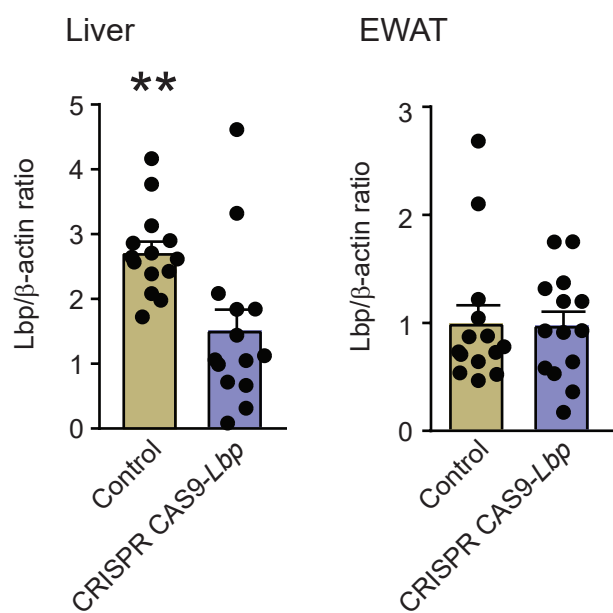

**Supplementary Figure 2. Abundance of LBP in liver and adipose tissue in mice treated with CRISPR CAS9-Lbp.** (A) Immunoblot showing LBP in liver and in adipose tissue from mice treated with adenovirus mediated CRISPR CAS9-Lbp or adenovirus negative control. (B) Semi-quantitative analysis of LBP abundance in liver and adipose tissue. n=14. \*\*p<0.01 determined by Student's t-test.

A

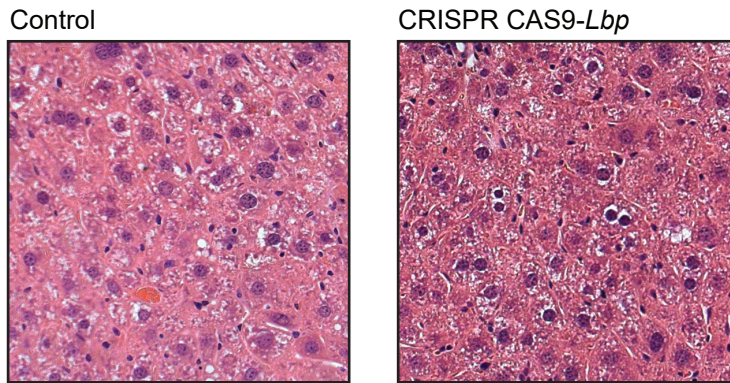

B

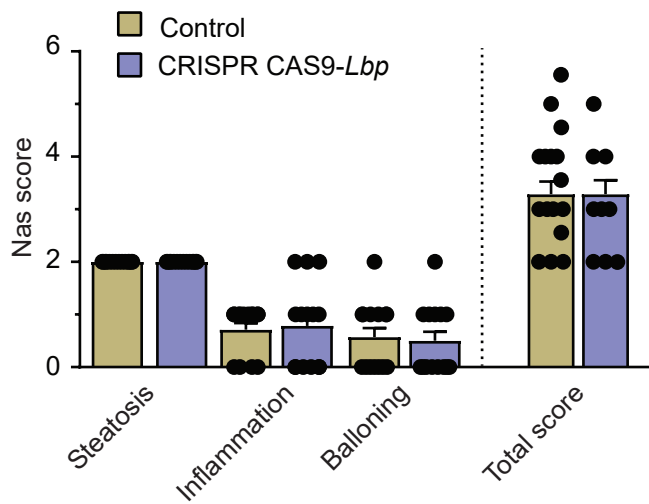

C

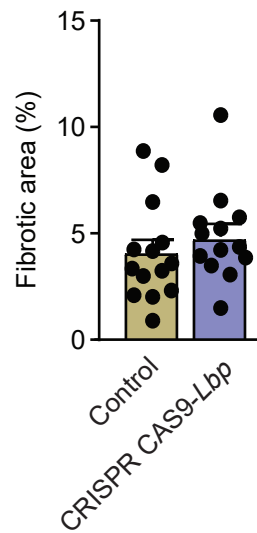

**Supplementary Figure 3. Liver status in mice treated with CRISPR CAS9-Lbp.** (A) Representative hematoxylin staining of liver tissue, (B) NAS score of liver tissue and (C) fibrotic area of liver tissue determined by Sirius Red staining in mice treated with adenovirus mediated CRISPR CAS9-Lbp or adenovirus negative control. n=14.

Supplementary Figure 3

Supplementary Table 1. Antibodies used in the study.

| Antibody                                        | Manufacturer   | Product number |
|-------------------------------------------------|----------------|----------------|
| Rabbit anti- $\beta$ -Actin (13E5) (1:500)      | Cell Signaling | 4970           |
| Rabbit anti-IRS1 (1:500)                        | EMD Millipore  | 06-248         |
| Rabbit anti-phospho-IRS1 (Tyr612) (1:500)       | EMD Millipore  | 09-732         |
| Rabbit anti-phospho-JNK (Thr183/Tyr185) (1:500) | Cell Signaling | 4668           |
| Mouse anti-JNK1 (1:500)                         | Cell Signaling | 3708           |
| Sheep anti-LBP (1:500)                          | R&D Systems    | AF6635         |

Supplementary Table 2. Biological processes in the liver regulated by the gut microbiota in wild type and *MyD88* KO mice.

| Category                             | Biological process                                               | p-value   |          |
|--------------------------------------|------------------------------------------------------------------|-----------|----------|
|                                      |                                                                  | Wild type | MyD88    |
| <b>Regulated wild type</b>           |                                                                  |           |          |
| GO:0015920                           | lipopolysaccharide transport                                     | 3.27E-02  |          |
| GO:0016126                           | sterol biosynthetic process                                      | 3.88E-05  |          |
| GO:0070372                           | regulation of ERK1 and ERK2 cascade                              | 8.89E-03  |          |
| <b>Regulated wild type and MyD88</b> |                                                                  |           |          |
| GO:0006629                           | lipid metabolic process                                          | 9.06E-07  | 8.65E-13 |
| GO:0006730                           | one-carbon metabolic process                                     | 9.63E-04  | 2.24E-04 |
| GO:0006732                           | coenzyme metabolic process                                       | 3.27E-02  | 4.42E-08 |
| GO:0006790                           | sulfur compound metabolic process                                | 9.61E-03  | 6.24E-06 |
| GO:0008152                           | metabolic process                                                | 3.00E-05  | 5.74E-13 |
| GO:0008202                           | steroid metabolic process                                        | 9.06E-07  | 4.60E-05 |
| GO:0016125                           | sterol metabolic process                                         | 1.64E-06  | 6.82E-03 |
| GO:0042445                           | hormone metabolic process                                        | 1.75E-02  | 2.19E-02 |
| GO:0044237                           | cellular metabolic process                                       | 3.67E-03  | 1.44E-13 |
| GO:0044238                           | primary metabolic process                                        | 4.39E-02  | 9.55E-09 |
| GO:0044281                           | small molecule metabolic process                                 | 1.06E-07  | 7.42E-26 |
| GO:0044283                           | small molecule biosynthetic process                              | 7.20E-05  | 5.09E-09 |
| GO:0044699                           | single-organism process                                          | 5.51E-03  | 1.47E-03 |
| GO:0044710                           | single-organism metabolic process                                | 2.76E-10  | 1.03E-24 |
| GO:0044711                           | single-organism biosynthetic process                             | 9.96E-05  | 4.73E-09 |
| GO:0051186                           | cofactor metabolic process                                       | 1.46E-02  | 1.27E-06 |
| GO:0051923                           | sulfation                                                        | 8.89E-03  | 1.25E-02 |
| GO:0055114                           | oxidation-reduction process                                      | 9.96E-05  | 6.72E-15 |
| GO:0071704                           | organic substance metabolic process                              | 1.36E-02  | 2.06E-10 |
| GO:1901564                           | organonitrogen compound metabolic process                        | 7.21E-03  | 8.63E-12 |
| GO:1901615                           | organic hydroxy compound metabolic process                       | 6.02E-06  | 6.14E-04 |
| <b>Regulated MyD88</b>               |                                                                  |           |          |
| GO:0005975                           | carbohydrate metabolic process                                   |           | 6.77E-03 |
| GO:0006575                           | cellular modified amino acid metabolic process                   |           | 2.18E-06 |
| GO:0006706                           | steroid catabolic process                                        |           | 1.25E-03 |
| GO:0006760                           | folic acid-containing compound metabolic process                 |           | 1.35E-02 |
| GO:0006766                           | vitamin metabolic process                                        |           | 2.40E-02 |
| GO:0006793                           | phosphorus metabolic process                                     |           | 2.33E-03 |
| GO:0006807                           | nitrogen compound metabolic process                              |           | 1.39E-04 |
| GO:0007586                           | digestion                                                        |           | 2.12E-02 |
| GO:0008209                           | androgen metabolic process                                       |           | 1.93E-02 |
| GO:0009056                           | catabolic process                                                |           | 4.30E-09 |
| GO:0009058                           | biosynthetic process                                             |           | 1.31E-03 |
| GO:0009069                           | serine family amino acid metabolic process                       |           | 1.42E-02 |
| GO:0009437                           | carnitine metabolic process                                      |           | 4.36E-02 |
| GO:0009991                           | response to extracellular stimulus                               |           | 6.21E-03 |
| GO:0010033                           | response to organic substance                                    |           | 3.28E-05 |
| GO:0010817                           | regulation of hormone levels                                     |           | 4.15E-03 |
| GO:0010876                           | lipid localization                                               |           | 1.09E-02 |
| GO:0019373                           | epoxygenase P450 pathway                                         |           | 7.48E-05 |
| GO:0019915                           | lipid storage                                                    |           | 6.34E-05 |
| GO:0032787                           | monocarboxylic acid metabolic process                            |           | 7.16E-14 |
| GO:0032922                           | circadian regulation of gene expression                          |           | 3.56E-03 |
| GO:0034330                           | cell junction organization                                       |           | 1.12E-02 |
| GO:0034641                           | cellular nitrogen compound metabolic process                     |           | 3.17E-02 |
| GO:0042180                           | cellular ketone metabolic process                                |           | 2.54E-05 |
| GO:0042221                           | response to chemical                                             |           | 1.68E-04 |
| GO:0042398                           | cellular modified amino acid biosynthetic process                |           | 4.83E-02 |
| GO:0042558                           | pteridine-containing compound metabolic process                  |           | 6.01E-03 |
| GO:0044712                           | single-organism catabolic process                                |           | 1.02E-11 |
| GO:0044723                           | single-organism carbohydrate metabolic process                   |           | 1.79E-02 |
| GO:0045216                           | cell-cell junction organization                                  |           | 1.20E-02 |
| GO:0046320                           | regulation of fatty acid oxidation                               |           | 1.27E-06 |
| GO:0046942                           | carboxylic acid transport                                        |           | 1.55E-05 |
| GO:0050892                           | intestinal absorption                                            |           | 2.53E-04 |
| GO:0051179                           | localization                                                     |           | 1.20E-02 |
| GO:0051341                           | regulation of oxidoreductase activity                            |           | 4.06E-02 |
| GO:0051353                           | positive regulation of oxidoreductase activity                   |           | 8.24E-03 |
| GO:0055086                           | nucleobase-containing small molecule metabolic process           |           | 5.62E-04 |
| GO:0065008                           | regulation of biological quality                                 |           | 1.62E-04 |
| GO:0071702                           | organic substance transport                                      |           | 2.78E-02 |
| GO:0072524                           | pyridine-containing compound metabolic process                   |           | 3.06E-02 |
| GO:0072593                           | reactive oxygen species metabolic process                        |           | 6.77E-03 |
| GO:0090322                           | regulation of superoxide metabolic process                       |           | 1.70E-02 |
| GO:1901135                           | carbohydrate derivative metabolic process                        |           | 4.86E-04 |
| GO:1901360                           | organic cyclic compound metabolic process                        |           | 9.29E-03 |
| GO:1901566                           | organonitrogen compound biosynthetic process                     |           | 5.28E-03 |
| GO:1901576                           | organic substance biosynthetic process                           |           | 2.14E-03 |
| GO:1901657                           | glycosyl compound metabolic process                              |           | 4.69E-02 |
| GO:2000323                           | negative regulation of glucocorticoid receptor signaling pathway |           | 4.50E-02 |
